# Supplementary material for: Network pharmacological analysis of active components of Xiaoliu decoction in the treatment of glioblastoma multiforme
Source: Frontiers journal article supplement (doi:10.3389/fgene.2022.940462), 2022-08-15
Supplement: Table_1.DOCX [file Table_1.DOCX]

| Chinese Pinyin name | Latin name |
| --- | --- |
| baizhi | A. Dahurica (Fisch.) Benth. Et Hook |
| Baizhu | Atractylodes Macrocephala Koidz. |
| banxia | Arum Ternatum Thunb |
| Banzhilian | Scutellariae Barbatae Herba |
| chenpi | Citrus Reticulata |
| Chuanxiong | Chuanxiong Rhizoma |
| Danshen | Radix Salviae |
| Fuling | Poria Cocos(Schw.) Wolf |
| Gancao | licorice |
| Gouteng | Uncariae Ramulus Cumuncis |
| Yanhusuo | Corydalis Rhizoma |
| Baihuasheshecao | Hedyotis Diffusae Herba |
